# Supplementary material
Source: publisher site journal article supplement (https://www.dovepress.com/article/526565)
Supplement: Supplementary file 1 [file 526565-Supplementary-Tables-1-3.docx]

**SUPPLEMENTARY MATERIAL**

Table S1: Full search strategy for the various databases

Medline Search

| Intervention | (Interven* or Manag* or Treat* or Support* or Therap*).tw |
| --- | --- |
| Second Victim Syndrome | (second victim syndrome or second victim phenomenon or second victim*).tw  OR  exp burnout, professional/ or (burnout or burn out or burn-out).tw  OR  exp stress disorders, post-traumatic/ or (psychological adaptation or post-traumatic stress or posttraumatic stress or stress disorder or ptsd).tw  OR  (wellness or wellbeing or well-being or well being).tw.  OR  exp Attitude of Health Personnel/ or (Attitude of Health Personnel or attitude of healthcare personnel or  health personnel attitude).tw. |
| Medical Errors | exp medical errors/ or (medical error*).tw  OR  exp intraoperative complications/ or (intraoperative complication* or complication*).tw  OR  (adverse event* or adverse outcome*).tw |
| Healthcare Personnel | exp personnel, hospital/ or exp health personnel/ or (doctor* or nurse* or clinician* or physician* or surgeon* or rn or practitioner* or healthcare personnel* or health care personnel* or paramedic* or provider*).tw |

Embase Search

| Intervention | (Interven* or Manag* or Treat* or Support* or Therap*):ti,ab |
| --- | --- |
| Second Victim Syndrome | ‘second victim syndrome’:ti,ab or ‘second victim phenomenon’:ti,ab or ‘second victim’:ti,ab  OR  ‘burnout’/exp or ‘professional burnout’/exp or ‘burnout’:ti,ab or ‘burn out’:ti,ab or ‘burn-out’:ti,ab  OR  ‘stress disorders, post-traumatic’/exp or (‘psychological adaptation’ or ‘post-traumatic stress’ or ‘posttraumatic stress’ or ‘stress disorder’ or ‘ptsd’):ti,ab  OR  ‘wellbeing’/exp or ‘wellbeing’:ti,ab or ‘wellness’:ti,ab or ‘well-being’:ti,ab or ‘well being’:ti,ab  OR  ‘Health Personnel Attitude’/exp or ‘health personnel attitude’:ti,ab  or ‘attitude of health personnel’:ti,ab or ‘attitude of healthcare personnel’:ti,ab |
| Medical Errors | ‘medical errors’/exp or (‘medical error*’):ti,ab  OR  ‘intraoperative complications’/exp or (‘intraoperative complication*’ or complication*):ti,ab  OR  (‘adverse event*’ or ‘adverse outcome*’):ti,ab |
| Healthcare Personnel | ‘personnel, hospital’/exp or ‘health personnel’/exp or (doctor* or nurse* or clinician* or physician* or surgeon* or rn or practitioner* or ‘healthcare personnel*’ or ‘health care personnel*’ or paramedic* or provider*):ti,ab |
| Article Filter | ‘article’/it |

Cochrane

| Intervention | (Interven* or Manag* or Treat* or Support* or Therap*):ti,ab,kw |
| --- | --- |
| Medical Errors | MeSH descriptor: [Medical Errors] explode all trees |
| MeSH descriptor: [Intraoperative Complications] explode all trees |
| ("medical error*" or “medical error”):ti,ab,kw  OR  ("intraoperative complication*" or "complication*"):ti,ab,kw  OR  ("adverse event" or “adverse events” or "adverse outcome" or “adverse outcomes”):ti,ab,kw |
| Second Victim Syndrome | MeSH descriptor: [Attitude of Health Personnel] explode all trees |
| MeSH descriptor: [Burn out] explode all trees |
| MeSH descriptor: [Professional Burnout] explode all trees |
| MeSH descriptor: [Stress Disorders, Post-Traumatic] explode all trees |
| ("second victim syndrome" or "second victim phenomenon" or "second victim"):ti,ab,kw  OR  ("burnout" or "burn out" or "burn-out"):ti,ab,kw  OR  ("wellness" or "wellbeing" or "well-being" or "well being"):ti,ab,kw  OR  (“psychological adaptation” or “post-traumatic stress” or “posttraumatic stress” or “stress disorder” or “ptsd”):ti,ab,kw  OR  ("Attitude of Health Personnel" or "attitude of healthcare personnel" or "health personnel attitude"):ti,ab,kw |
| Healthcare Personnel | MeSH descriptor: [Health Personnel] explode all trees |
| ("doctor" or "doctors" or "nurse" or "nurses" or "clinician" or "clinician" or "physician" or "physicians" or "surgeon" or "surgeons" or "RN" or "practitioner" or "practitioners" or "healthcare personnel" or "healthcare personnels" or "health care personnel" or "health care personnels" or "paramedic" or "paramedics" or "provider" or "providers"):ti,ab,kw |

Table S2: Details of excluded studies after full-text review

| **Study** | **Reason(s) for Exclusion** |
| --- | --- |
| White et al. 2015 [80] | Wrong Patient Population |
| Mohd Kamaruzaman et al. 2022 [68] | Wrong outcomes |
| Hess et al. 2024 [55] | Wrong outcomes |
| Shapiro et al. 2016 [75] | Wrong outcomes |
| Burlison et al. 2017 [42] | Wrong intervention |
| Mira et al. 2017 [66] | Wrong outcomes |
| Mok et al. 2020 [69] | Wrong outcomes |
| Harrison et al. 2015 [53] | Wrong outcomes |
| Scrimgeour et al. 2024 [73] | Wrong study design |
| Reiser Crelier et al. 2020 [70] | Wrong outcomes |
| Khajouei et al. 2023 [58] | Wrong patient population |
| Stone et al. 2020 [76] | Wrong study design |
| Merandi et al. 2017 [65] | Wrong outcomes |
| Kappes et al. 2024 [56] | Wrong intervention |
| Li et al. 2023 [62] | Wrong intervention |
| Fall et al. 2024 [47] | Wrong outcomes |
| Zhang et al. 2019 [82] | Wrong intervention |
| Kershaw et al. 2007 [57] | Wrong intervention |
| Khansa et al. 2022 [59] | Wrong intervention |
| Ferrus et al. 2021 [50] | Wrong outcomes |
| Eldt et al. 2024 [46] | Wrong outcomes |
| Lane et al. 2018 [60] | Wrong outcomes |
| Chen et al. 2022 [43] | Wrong intervention |
| Van Pelt et al. 2008 [79] | Wrong outcomes |
| Shuang et al. 2024 [44] | Incomplete study |
| Bredenkamp et al. 2024 [41] | Wrong study design |
| Schiechtl et al. 2013 [71] | Wrong study design |
| Bamdad et al. 2022 [40] | Wrong intervention |
| Gupta et al. 2022 [52] | Wrong intervention |
| Winning et al. 2018 [81] | Wrong intervention |
| Marmon et al. 2015 [63] | Wrong outcomes |
| Lewis et al. 2015 [61] | Wrong outcomes |
| Seitz et al. 2023 [74] | Wrong outcomes |
| Scott et al. 2010 [72] | Wrong outcomes |
| Trent et al. 2016 [78] | Wrong outcomes |
| Govindan et al. 2019 [51] | Wrong outcomes |
| Fatima et al. 2021 [48] | Wrong outcomes |
| Copley et al. 2024 [45] | Wrong outcomes |
| Tamburri et al. 2017 [77] | Wrong outcomes |
| Harrison et al. 2017 [54] | Wrong outcomes |
| Marr et al. 2021 [64] | Wrong outcomes |
| Fendel et al. 2021 [49] | Wrong patient population |
| Mira et al. 2015 [67] | Wrong outcomes |

Table S3: Detailed breakdown of JBI critical appraisal checklist for studies included

| **Author, Year** | Q1 | Q2 | Q3 | Q4 | Q5 | Q6 | Q7 | Q8 | Q9 | Score | Overall Qualitya |
| --- | --- | --- | --- | --- | --- | --- | --- | --- | --- | --- | --- |
| Agrawal, 2021 | Yes | Yes | NA | No | No | Yes | Yes | Yes | Yes | 66.7 | Moderate |
| Bursch, 2024 | Yes | Yes | NA | No | Yes | No | Yes | Yes | Yes | 66.7 | Moderate |
| Cobos-Vargas, 2022 | Yes | Yes | NA | No | No | Yes | Yes | Yes | Yes | 66.7 | Moderate |
| Dukhanin, 2018 | Yes | Yes | NA | No | No | No | Yes | Yes | Yes | 55.6 | Moderate |
| Edrees, 2016 | Yes | Yes | NA | No | Yes | No | Yes | Yes | Yes | 66.7 | Moderate |
| ElHechi, 2020 | Yes | Yes | NA | No | No | Yes | Yes | Yes | Yes | 66.7 | Moderate |
| Finney, 2021 | Yes | Yes | NA | No | Yes | No | Yes | Yes | Yes | 66.7 | Moderate |
| Krzan, 2015 | Yes | Yes | NA | No | Yes | No | Yes | Yes | Yes | 66.7 | Moderate |
| Li, 2023 | Yes | Yes | NA | No | Yes | Yes | Yes | Yes | Yes | 77.8 | High |
| Pelikan, 2023 | Yes | Yes | NA | No | Yes | No | Yes | Yes | Yes | 66.7 | Moderate |
| Rivera-Chiauzzi, 2024 | Yes | Yes | NA | No | No | No | Yes | Yes | Yes | 55.6 | Moderate |
| Schroder, 2022 | Yes | Yes | NA | No | No | Yes | Yes | Yes | Yes | 66.7 | Moderate |
| Simpson, 2023 | Yes | Yes | NA | No | No | No | Yes | Yes | Yes | 55.6 | Moderate |
| Thompson, 2022 | Yes | Yes | NA | No | Yes | No | Yes | Yes | Yes | 66.7 | Moderate |
| Vogt, 2024 | Yes | Yes | NA | No | Yes | No | Yes | Yes | Yes | 66.7 | Moderate |

Legend:

Q1: Is it clear in the study what is the ‘cause’ and what is the ‘effect’ (i.e. there is no confusion about which variable comes first)?

Q2: Were the participants included in any comparisons similar?

Q3: Were the participants included in any comparisons receiving similar treatment/care, other than the exposure or intervention of interest?

Q4: Was there a control group?

Q5: Were there multiple measurements of the outcome both pre and post the intervention/exposure?

Q6: Was follow up complete and if not, were differences between groups in terms of their follow up adequately described and analyzed?

Q7: Were the outcomes of participants included in any comparisons measured in the same way?

Q8: Were outcomes measured in a reliable way?

Q9: Was appropriate statistical analysis used?

a High quality: >70%, Moderate quality: 50-70%, Low quality: <50%
